# Supplementary material
Source: PubMed Central journal article supplement (PMC5129728)
Supplement: supp_pp.16.01463_PP2016-01463DR1_Supplemental_Materialfigs.pdf [file supp_pp.16.01463_PP2016-01463DR1_Supplemental_Materialfigs.pdf]

Supplemental Figure 1.

**A**

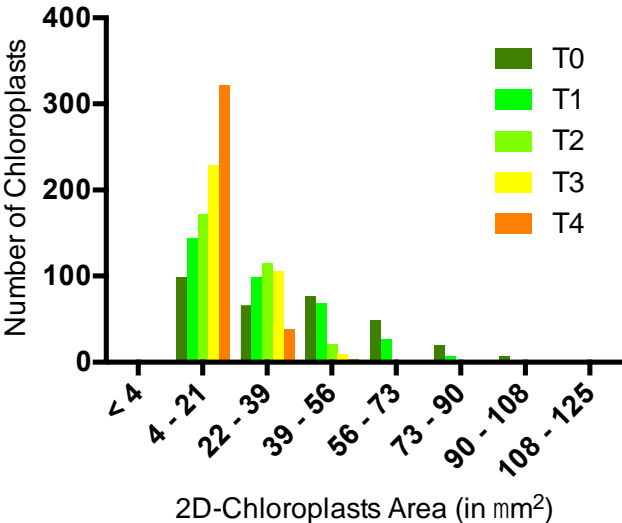

**B**

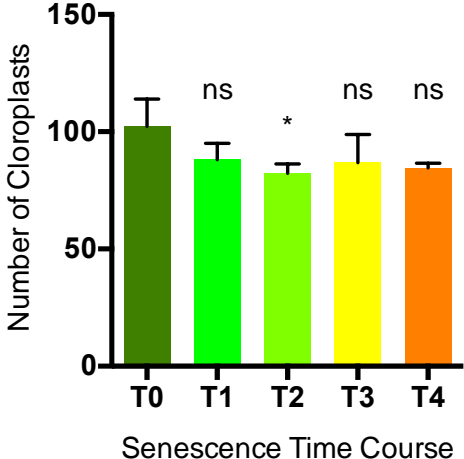

**C**

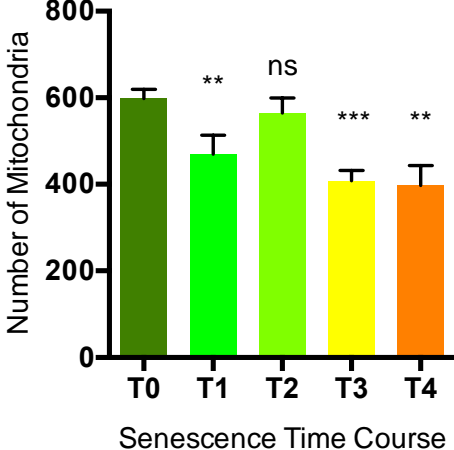

**Supplemental Figure 2.**

Electron microscopy. P: plastid, M: mitochondrion, Px: peroxisome.

T0: 0% chlorophyll degraded (magnification x30 000)

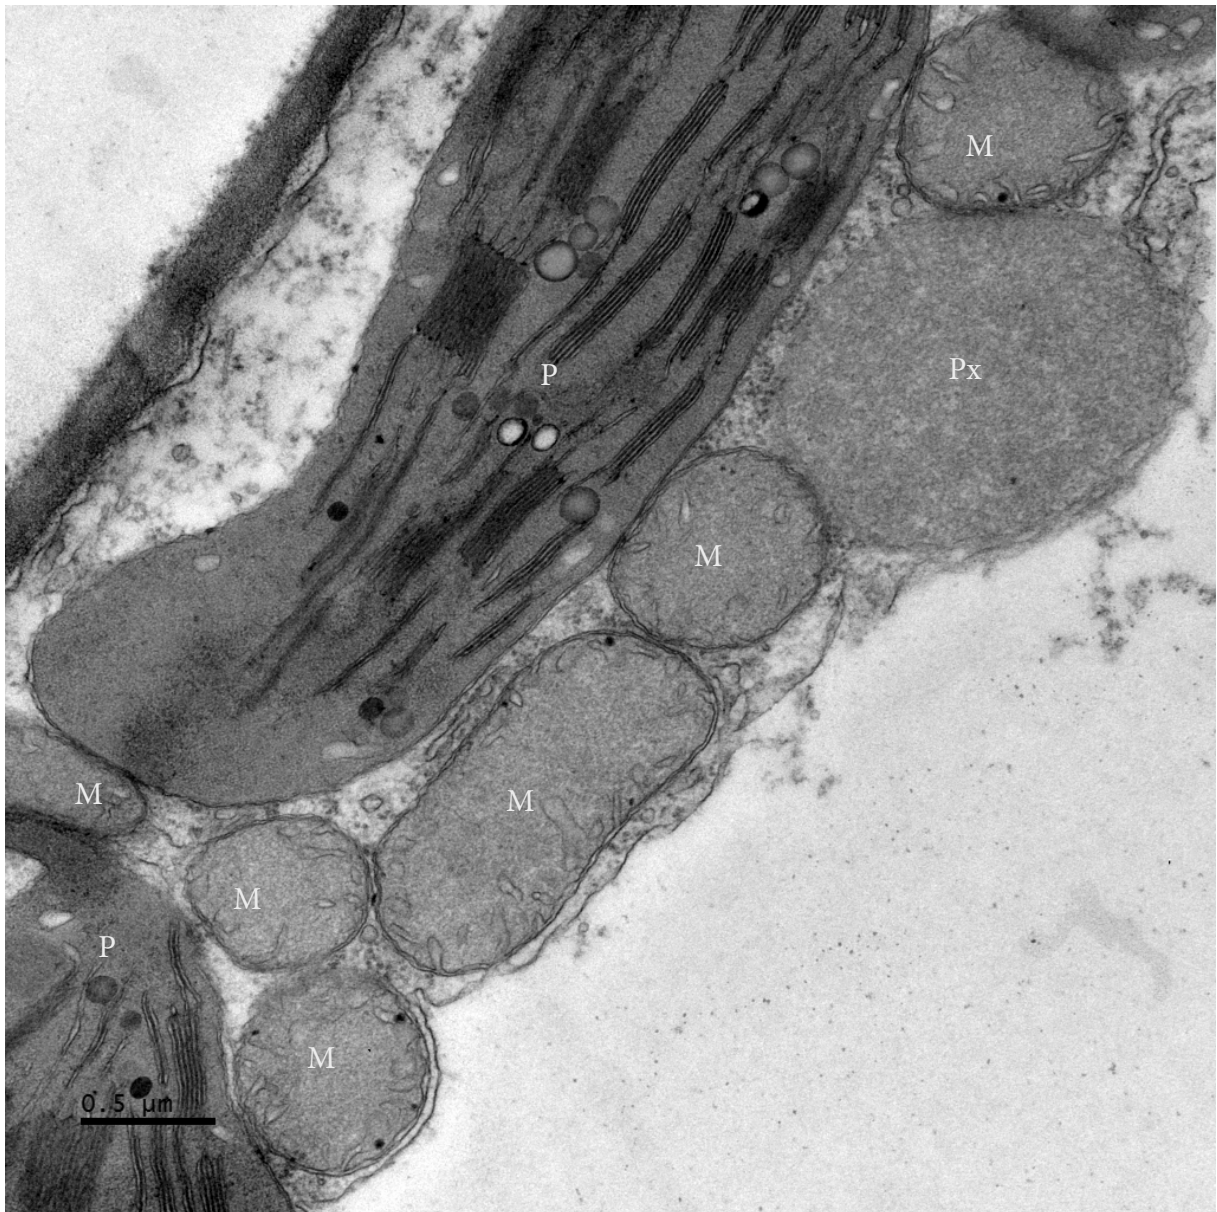

T0: 0% chlorophyll degraded (magnification x50 000)

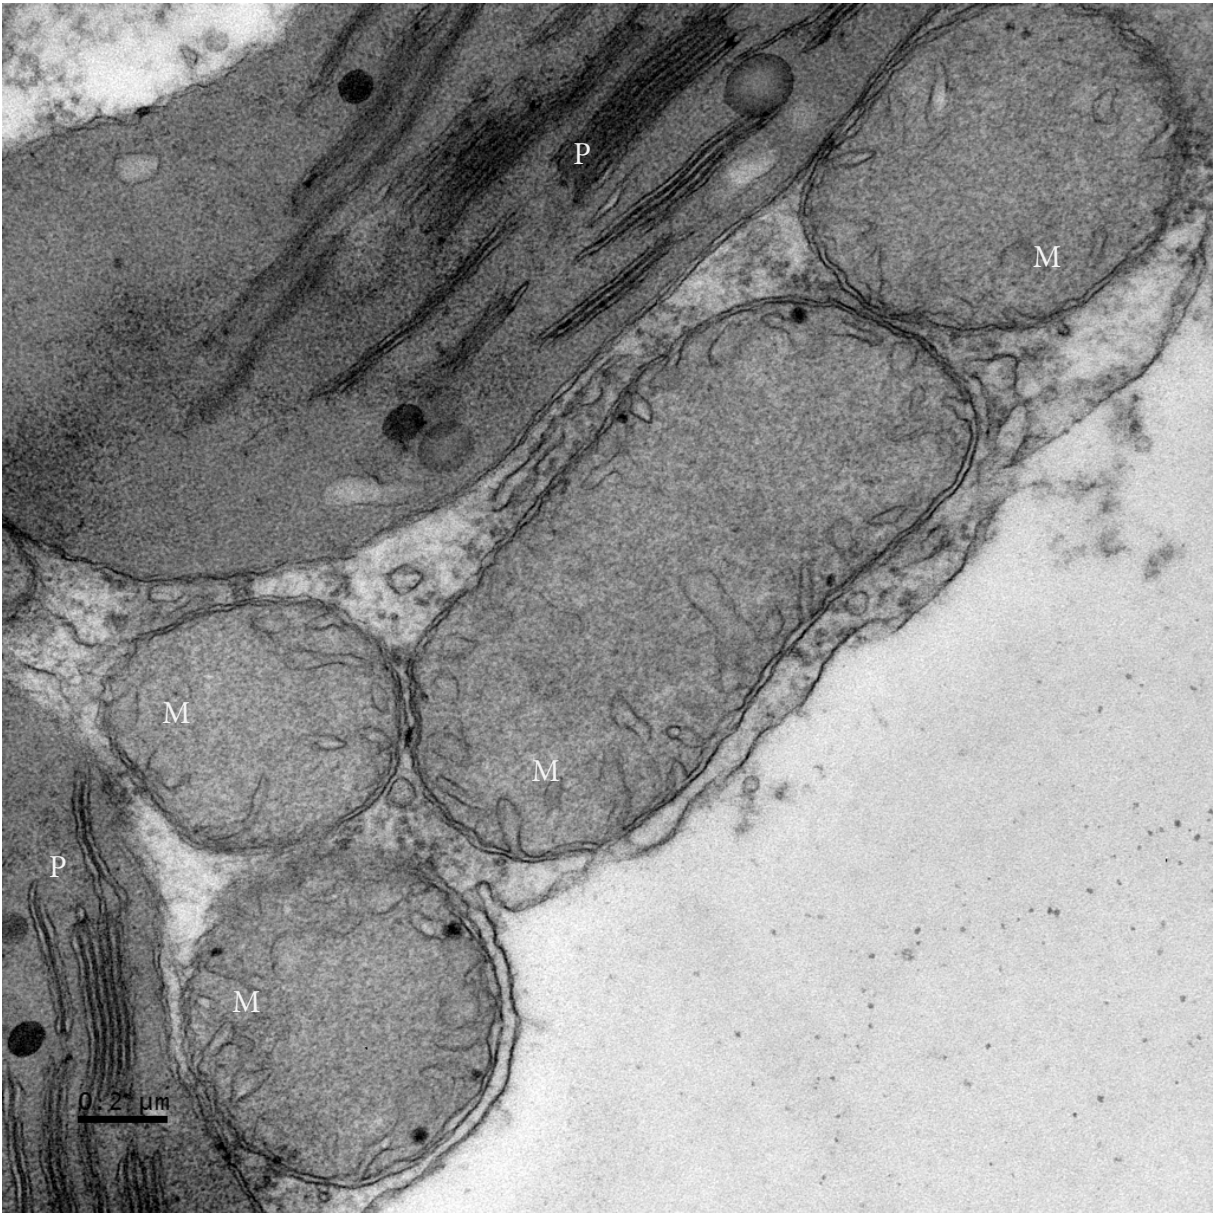

T2: 40-60% chlorophyll degraded (magnification x30 000)

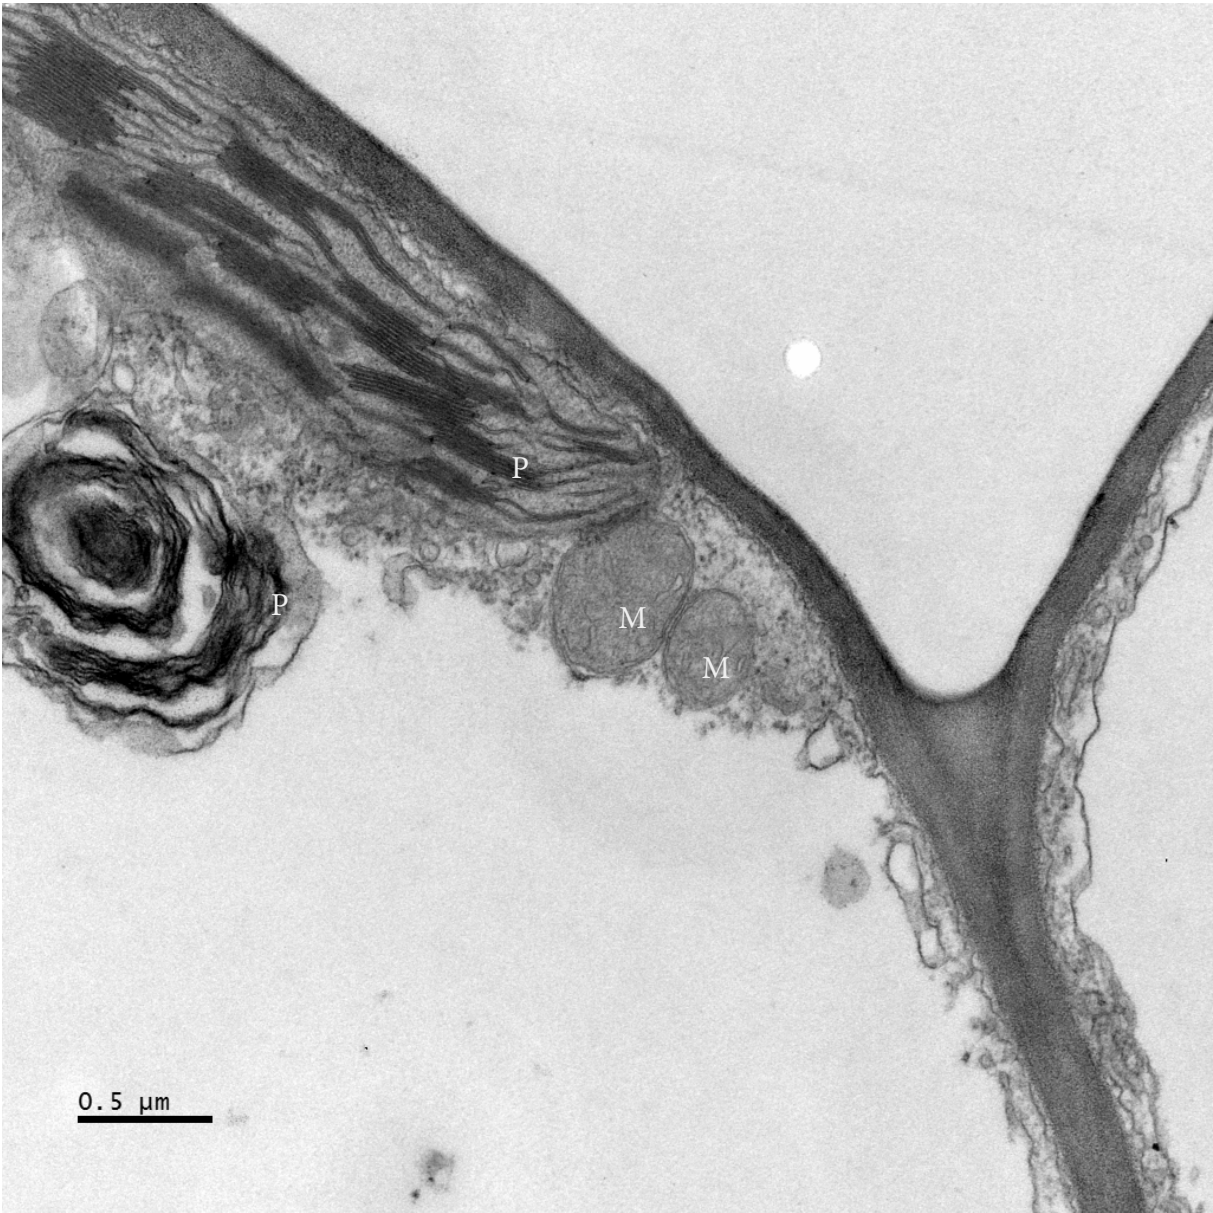

T2: 40-60% chlorophyll degraded (magnification x50 000)

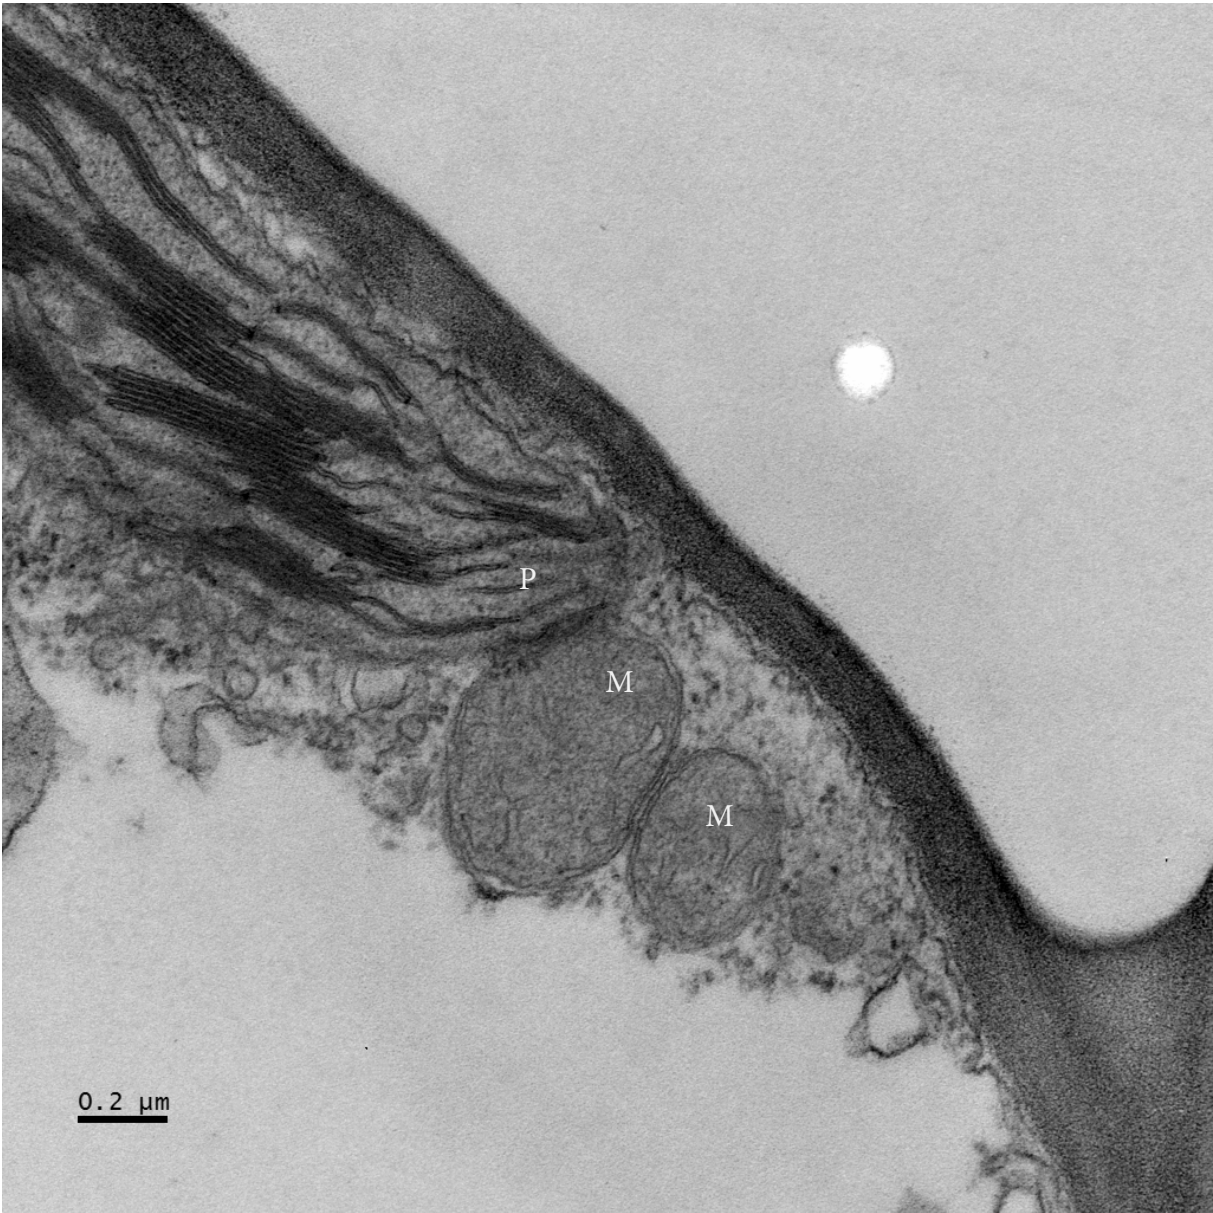

T4: >80% chlorophyll degraded (magnification x30 000)

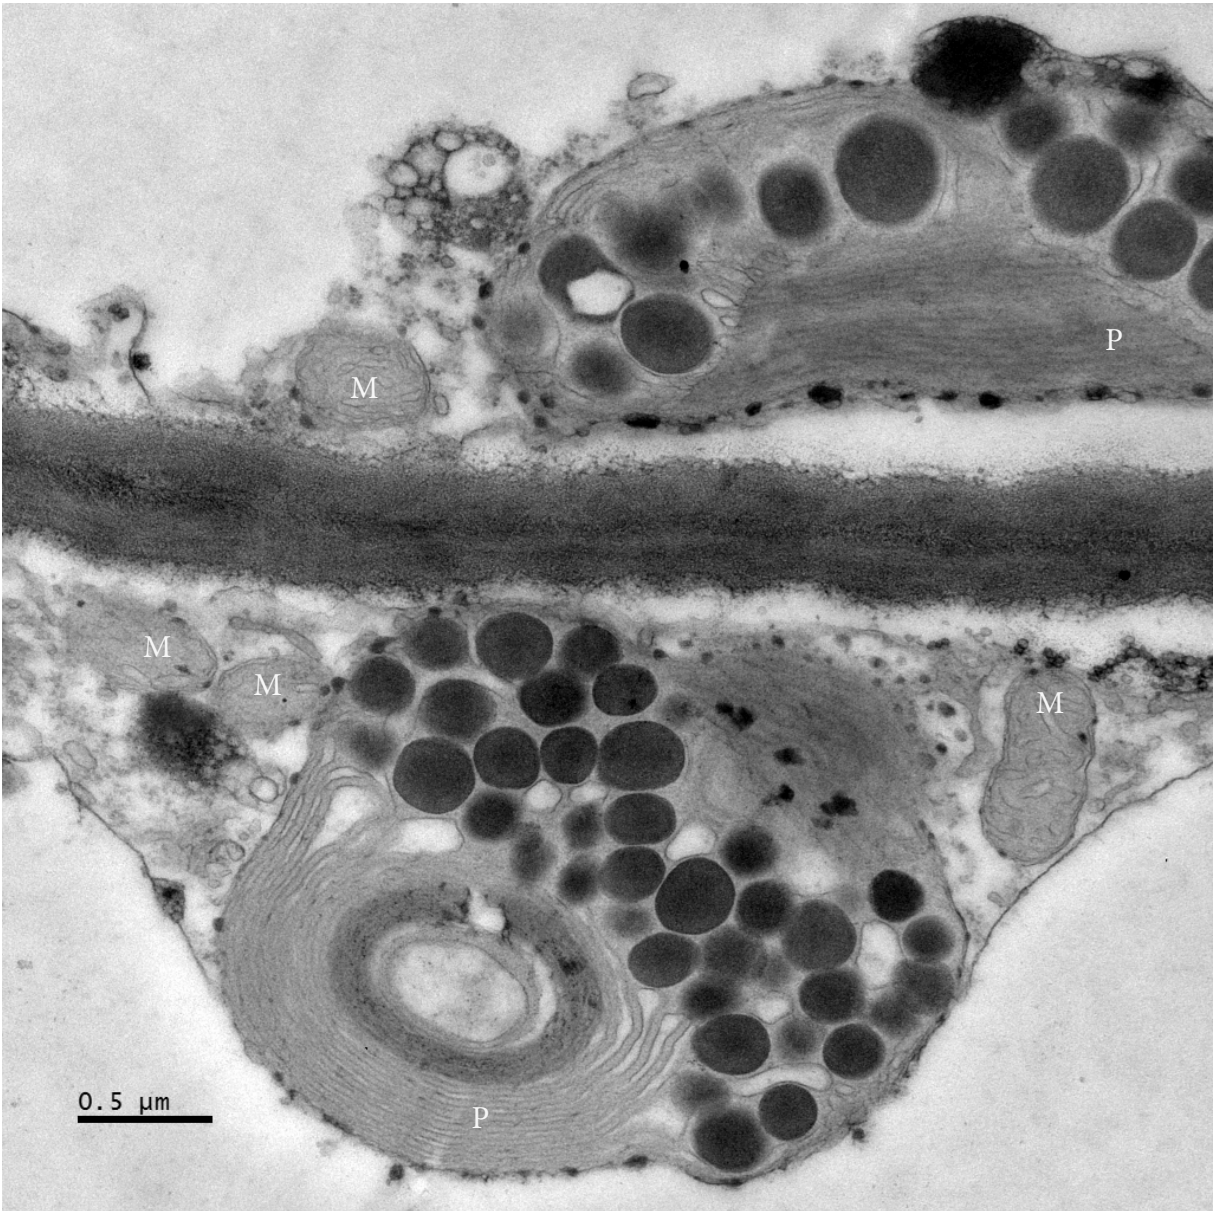

T4: >80% chlorophyll degraded (magnification x50 000)

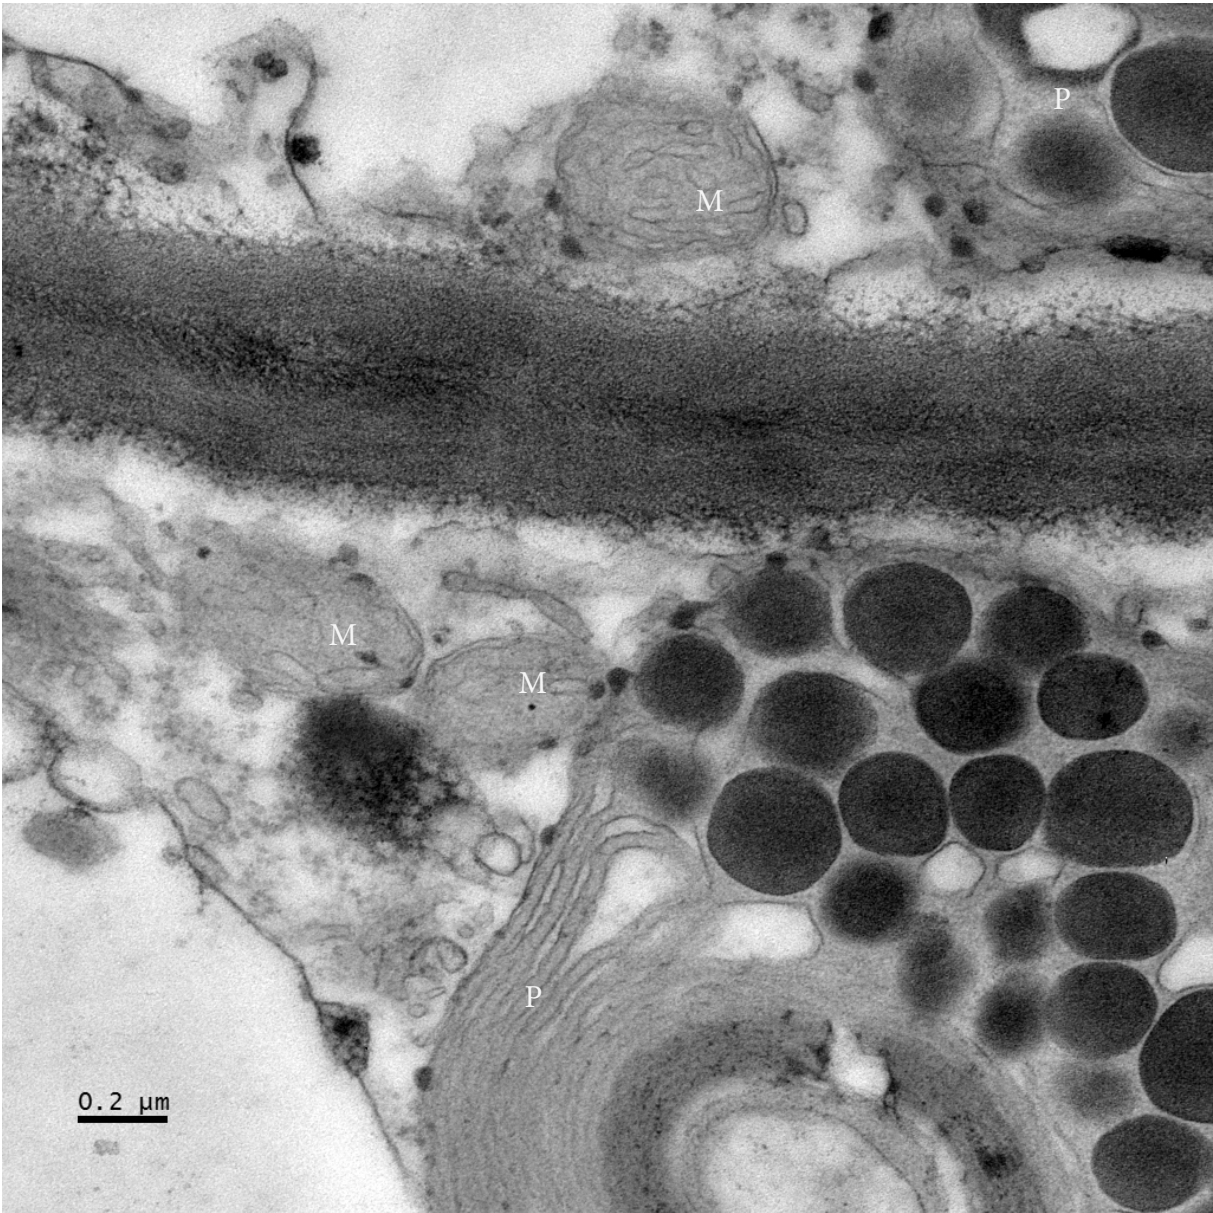

# Supplemental Figure 3.

**A**

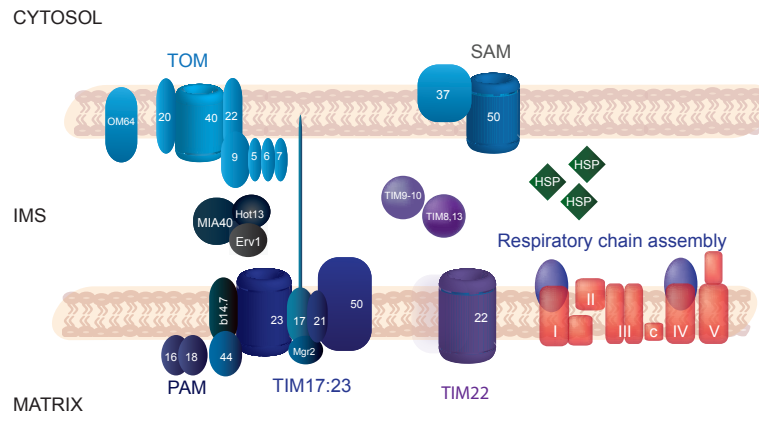

**B**

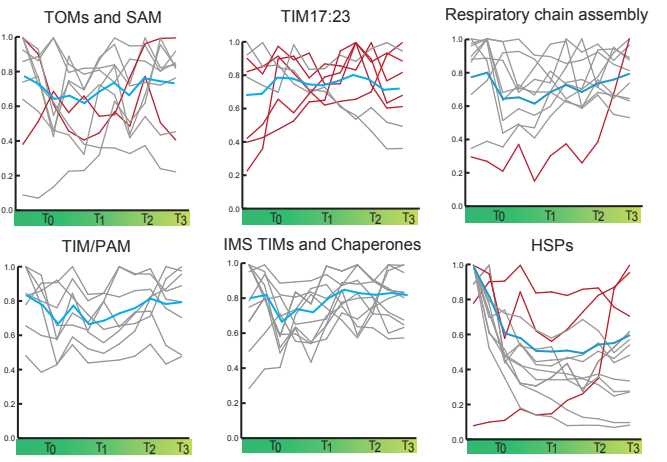



### Supplemental Figure 4.

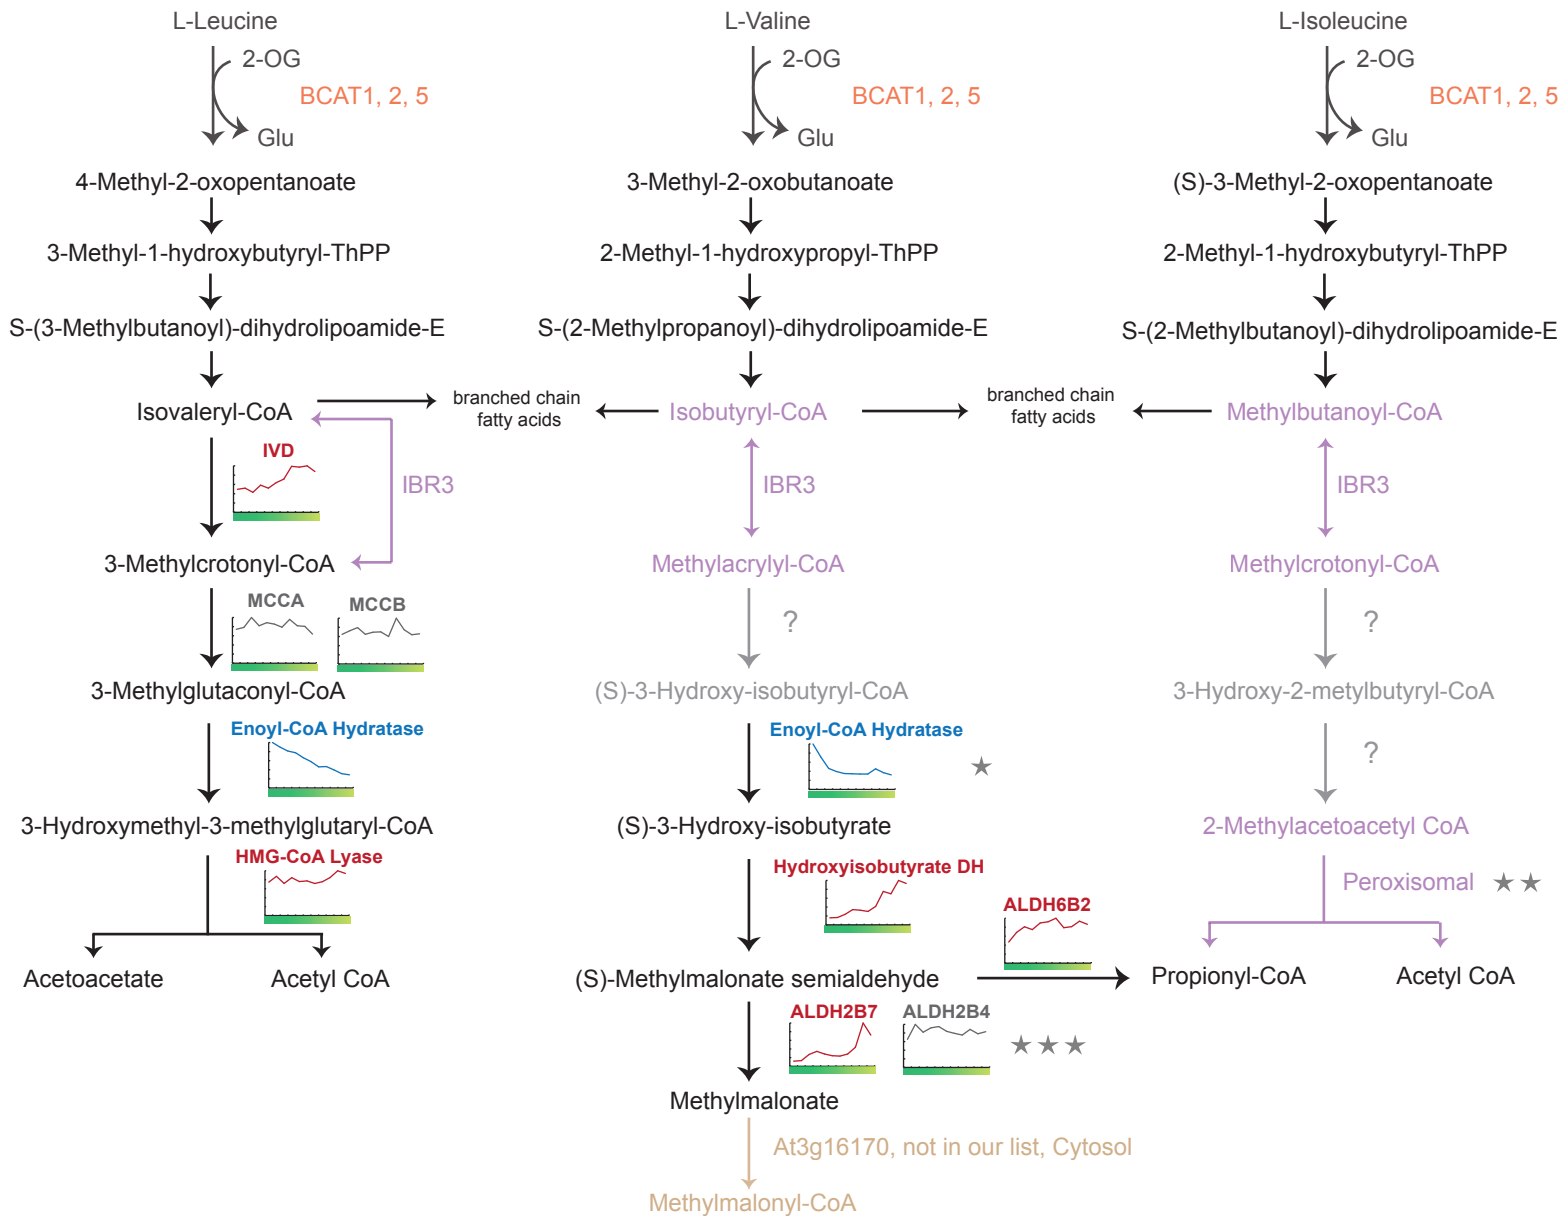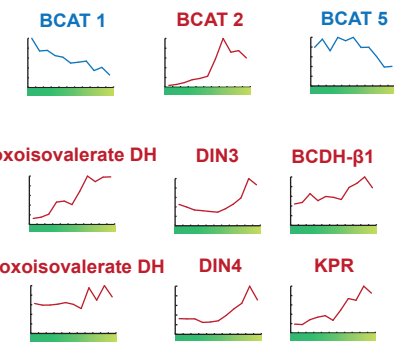

**BCKDH complex**

#### BCATs:

- BCAT3: At3g49680, not in our list, Plastid
- BCAT4: At3g19710, not in our list, Cytosol
- BCAT6: At1g50110, not in our list, Cytosol
- BCAT7: At1g50090, not in our list, Cytosol

#### BCKDH complex:

- mtLPD2: At3g17240, not in our list, Mitochondrial
- mtLPD1: At1g48030, not in our list, Mitochondrial

IBR3: At3g06810, not in our list, Peroxisomal

- ★
- At1g06550, not in our list, Peroxisomal
- At2g30650, not in our list, Peroxisomal
- At2g30660, not in our list, Peroxisomal
- At3g60510, not in our list, Mitochondrial
- At5g69540, not in our list, Peroxisomal

- ★★
- At1g04710, not in our list, Peroxisomal
- At2g33150, not in our list, Peroxisomal
- At5g48880, not in our list, Peroxisomal

- ★★★
- At1g44170 (ALDH3H1), not in our list, Cytosol, ER, PM
- At1g54100 (ALDH7B4), not in our list, Cytosol
- At4g34240 (ALDH3I1), not in our list, Plastid
- At4g36250 (ALDH3F1), not in our list, Cytosol, ER

# Supplemental Figure 5.

A

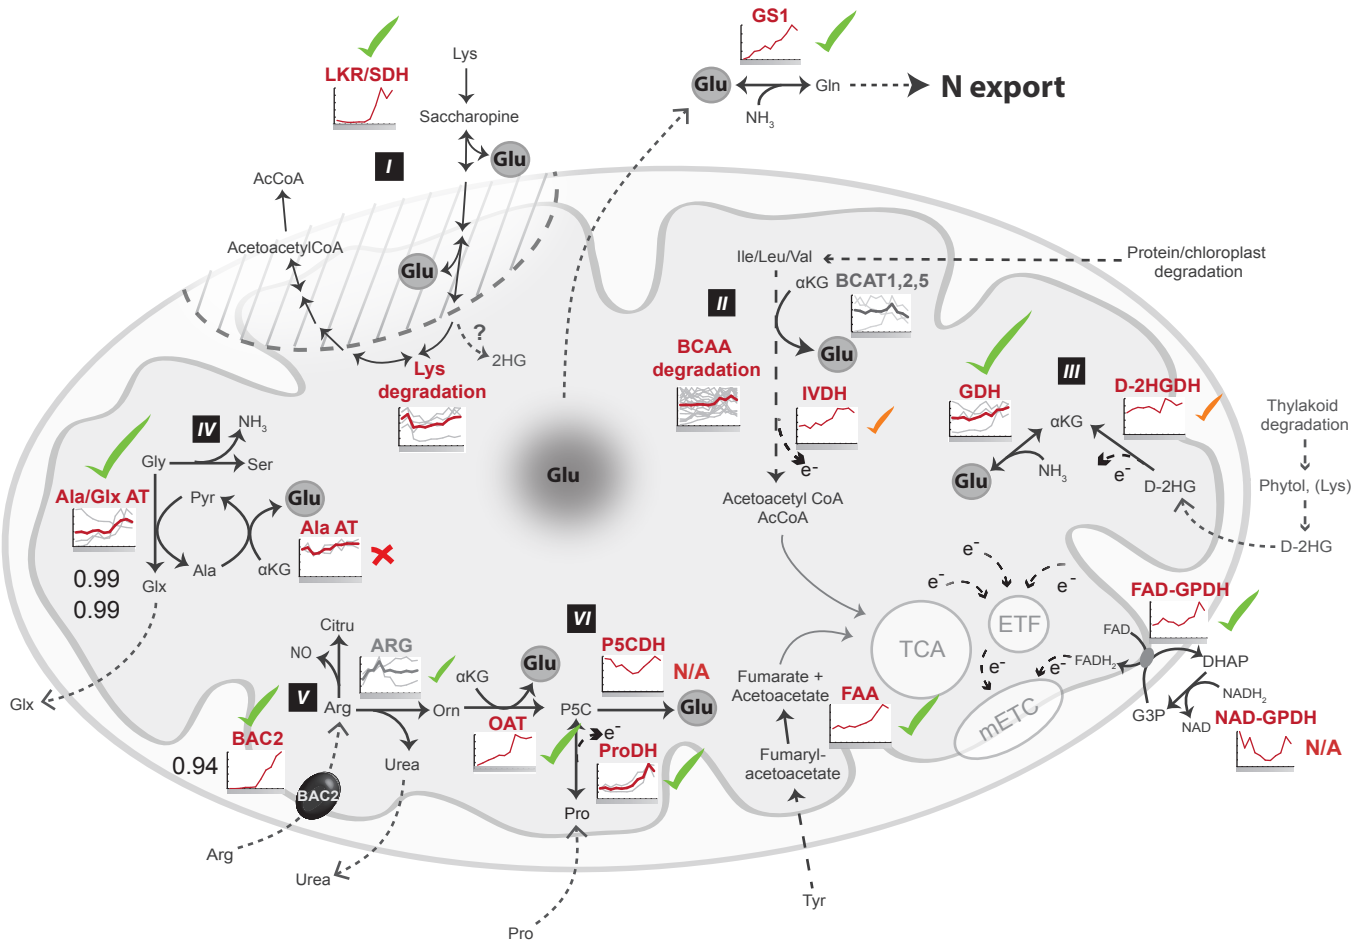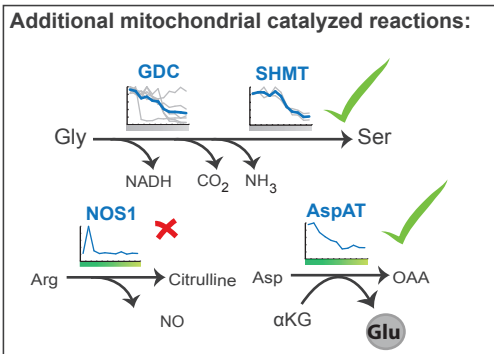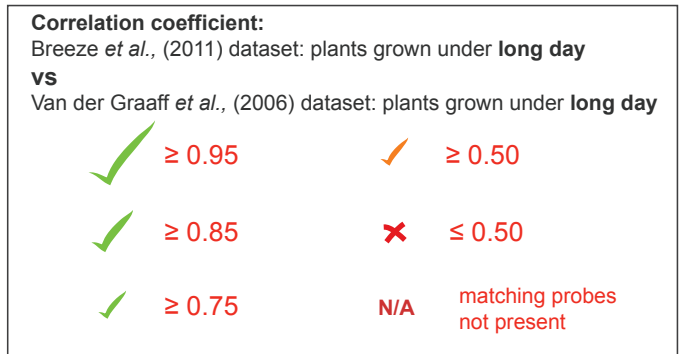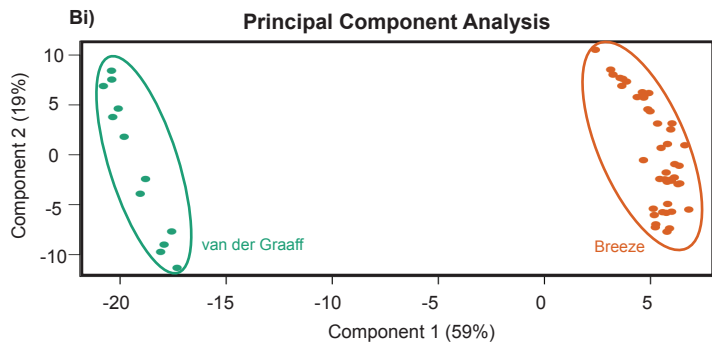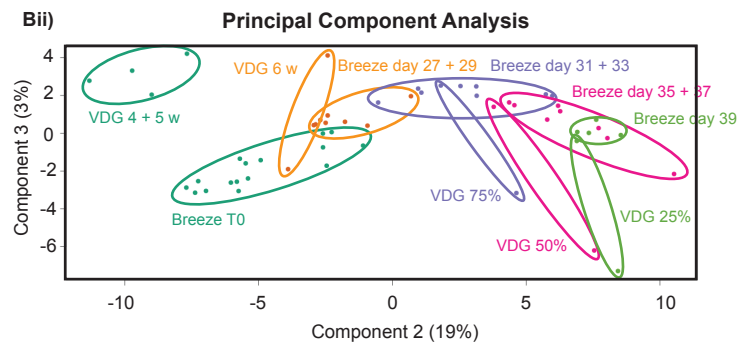

## Supplemental Figure 6.

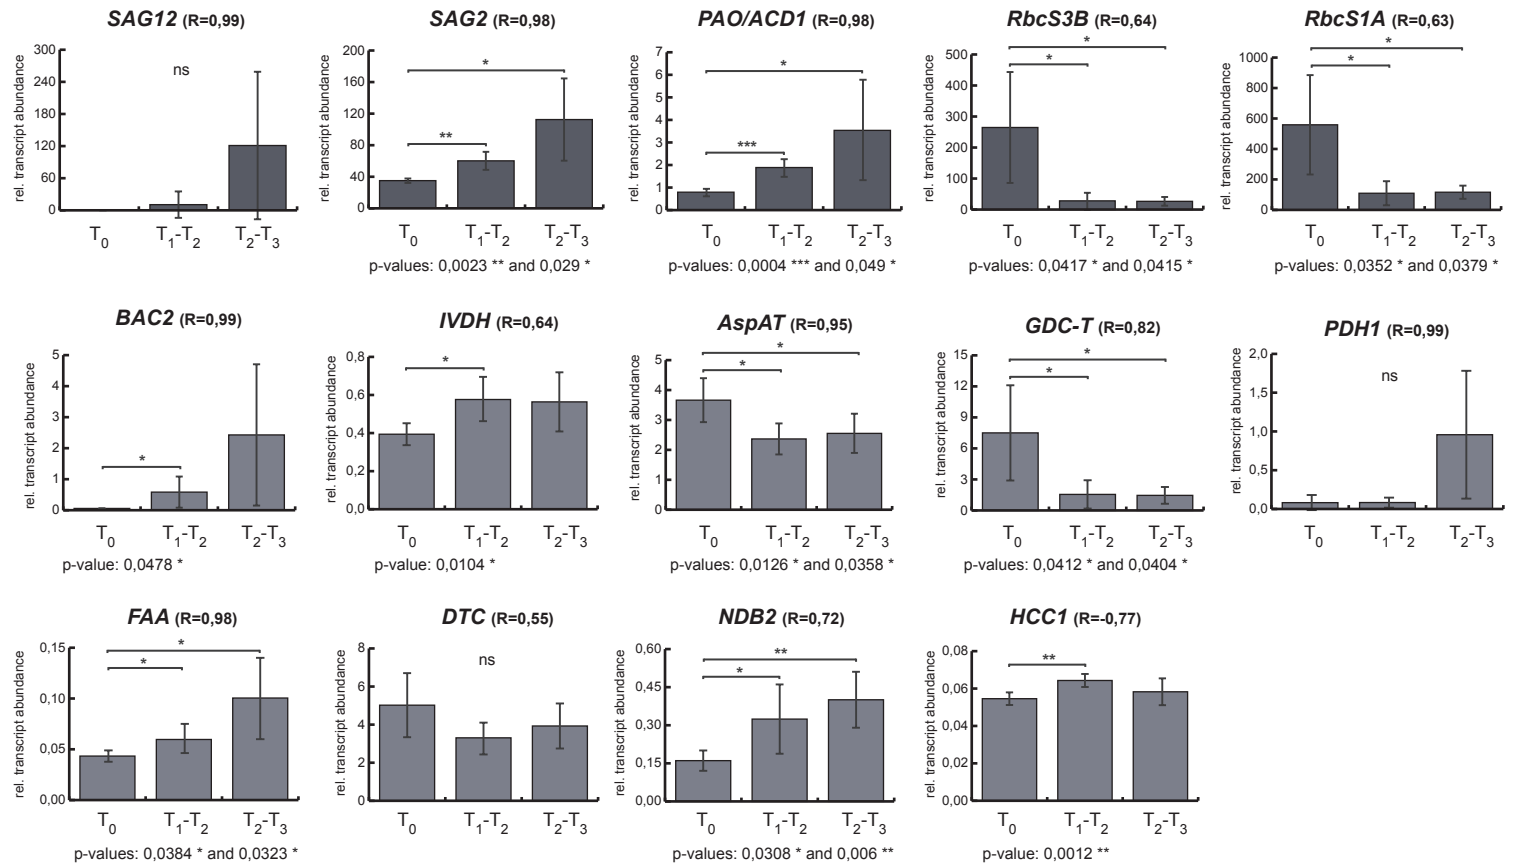

|                        |            |           |
|------------------------|------------|-----------|
| <b>SAGs</b>            | SAG12      | AT5G45890 |
|                        | SAG2       | AT5G60360 |
|                        | RBCS3B     | AT5G38410 |
|                        | RBCS1A     | AT1G67090 |
|                        | PAO/ACD1   | AT3G44880 |
| <b>Reference genes</b> | TIP41-like | AT4G34270 |
|                        | EIF4A1     | AT3G13920 |
|                        | MCF        | AT5G48970 |
| <b>tested genes</b>    | GDC-T      | AT1G11860 |
|                        | BAC2       | AT1G79900 |
|                        | AspAT      | AT2G30970 |
|                        | IVDH       | AT3G45300 |
|                        | PDH1       | AT3G30775 |
|                        | FAA        | AT4G15940 |
|                        | DTC        | AT5G19760 |
|                        | NDB2       | AT4G05020 |
| HCC1                   | AT3G08950  |           |
